# Supplementary material
Source: PubMed Central journal article supplement (PMC4744924)
Supplement: CVI.00426-15_zcd999095297so1.pdf [file CVI.00426-15_zcd999095297so1.pdf]

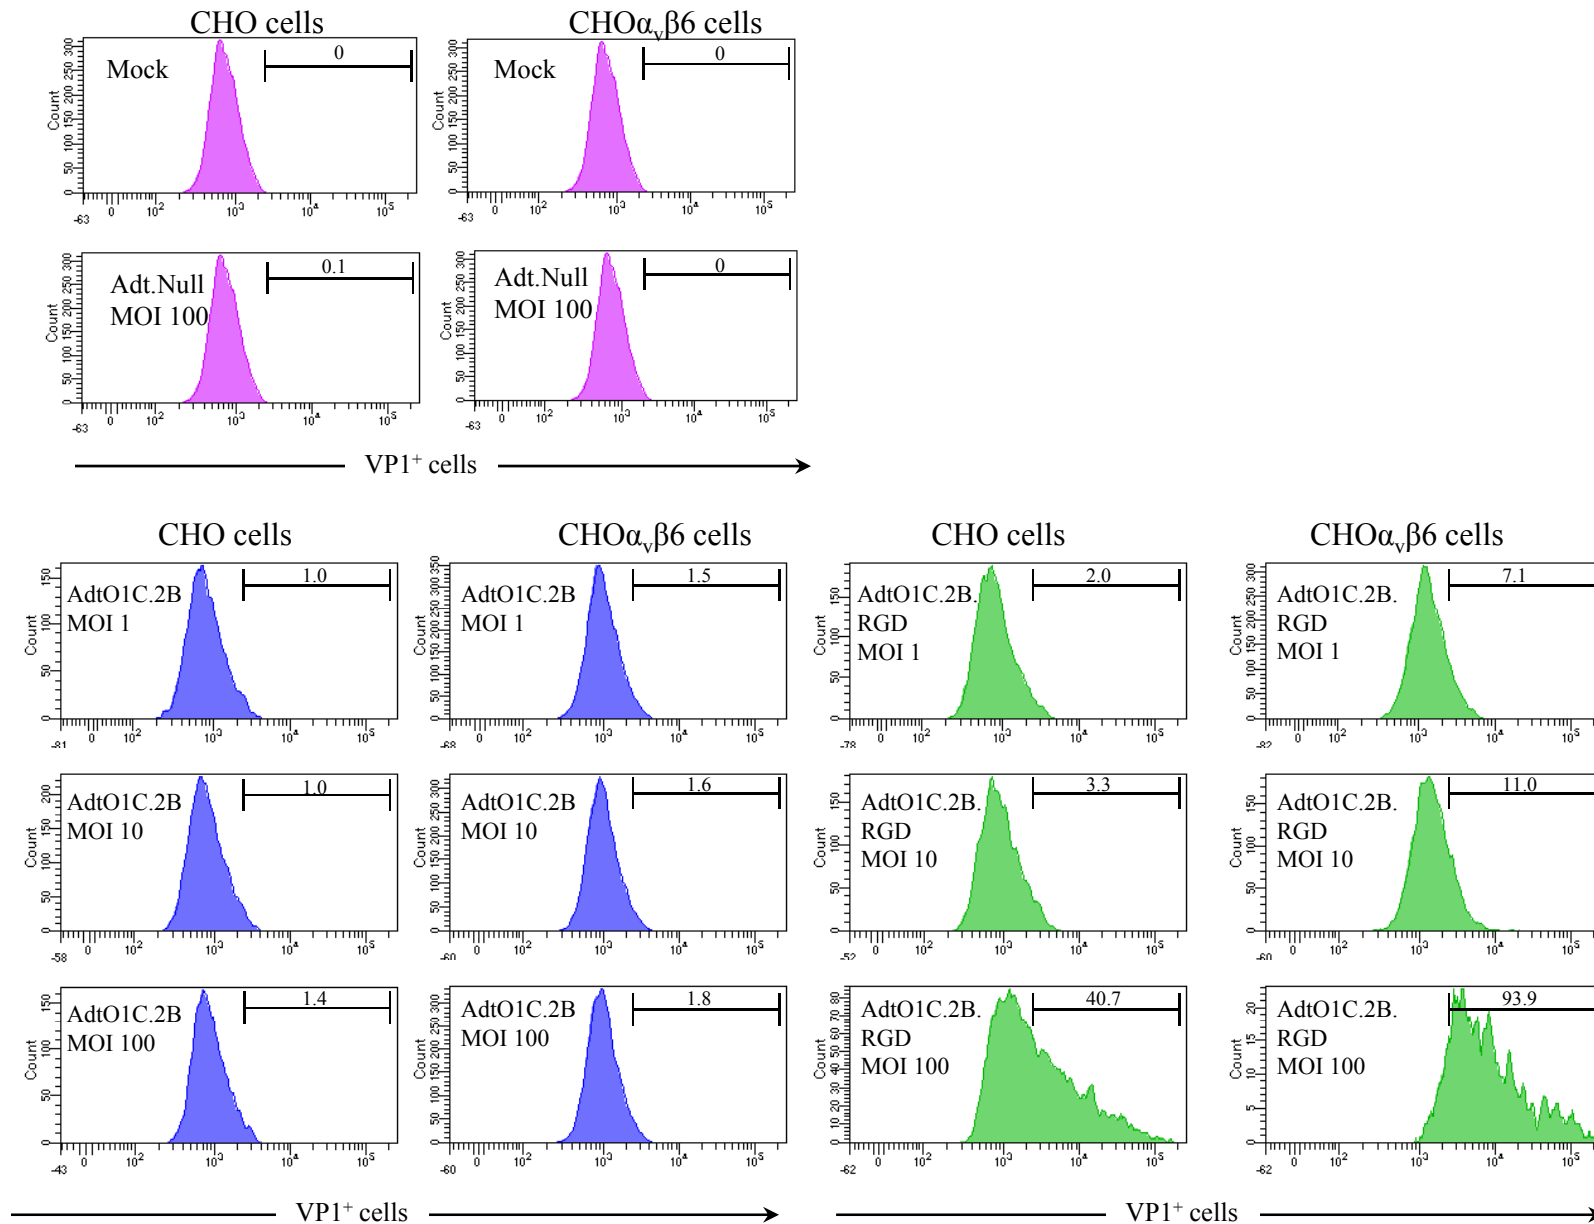

**Supplementary Figure 1. Detection of FMDV VP1 protein by FACS analysis.** CHO or CHO $\alpha_v\beta_6$  cells were mock infected or infected with Adt.Null, AdtO1C.2B or AdtO1C.2B.RGD at MOI 1-100 followed by incubation at 37°C and 5% CO<sub>2</sub>. After 18 h cells were treated with a protein transport inhibitor containing monensin and incubated for 6 hours. Cells were scraped off the plate, resuspended in PBS and stained for LIVE/DEAD and FMDV VP1 as described in Material and Methods.
